# Supplementary material for: Functional investigation of SLC1A2 variants associated with epilepsy
Source: PubMed Central journal article supplement (PMC9772344; doi:10.1038/s41419-022-05457-6), 2022-12-21

**Figure 1D**

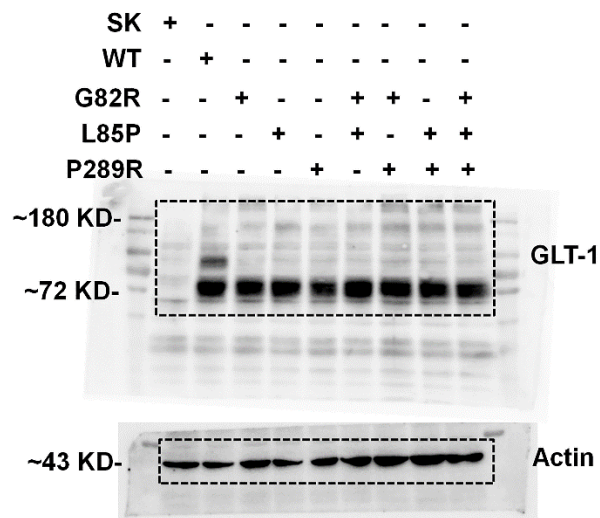

**Figure 1F**

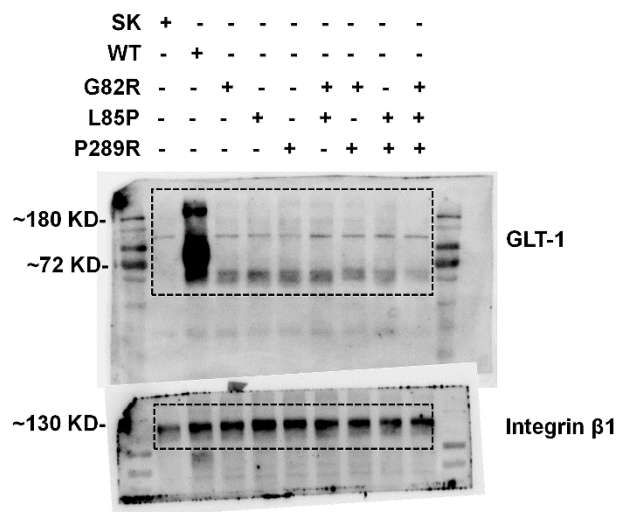

**Figure 1H**

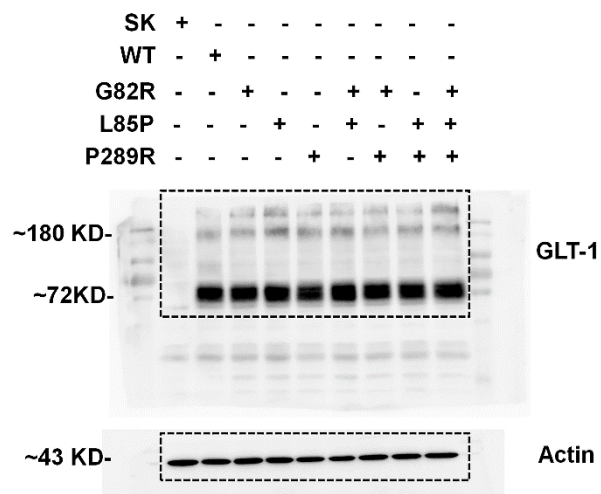

**Figure 3C**

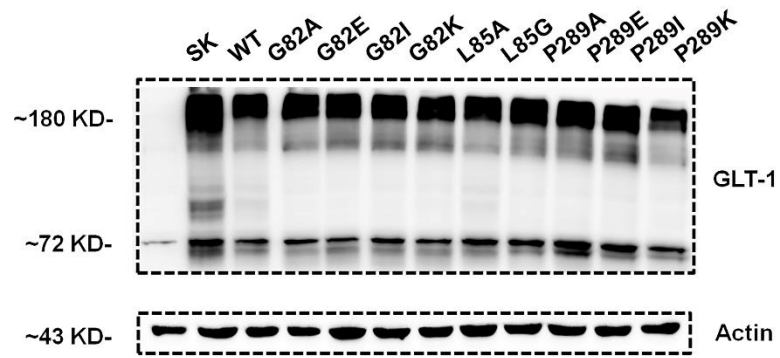

**Figure 3E**

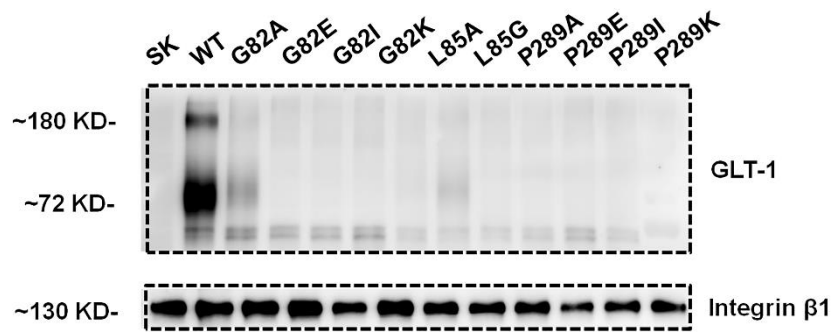

**Figure 3G**

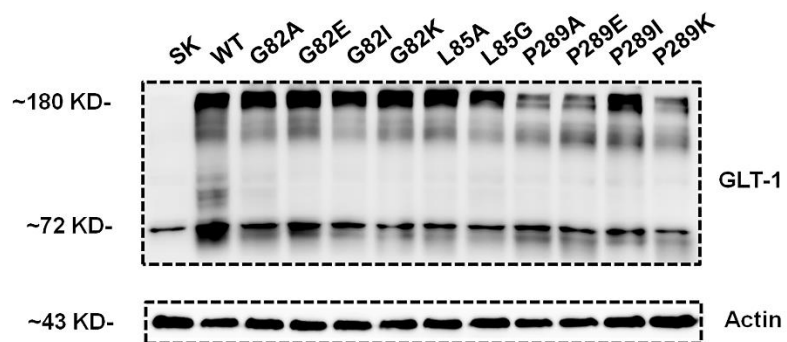

Figure 4A

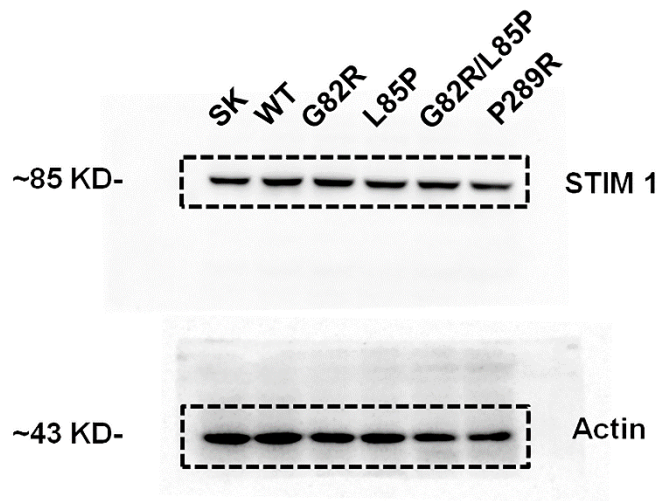

Figure 4C

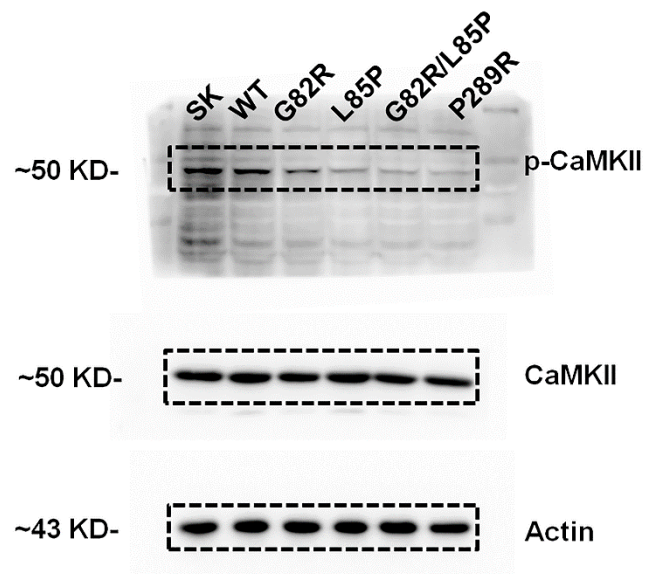

Figure 4E

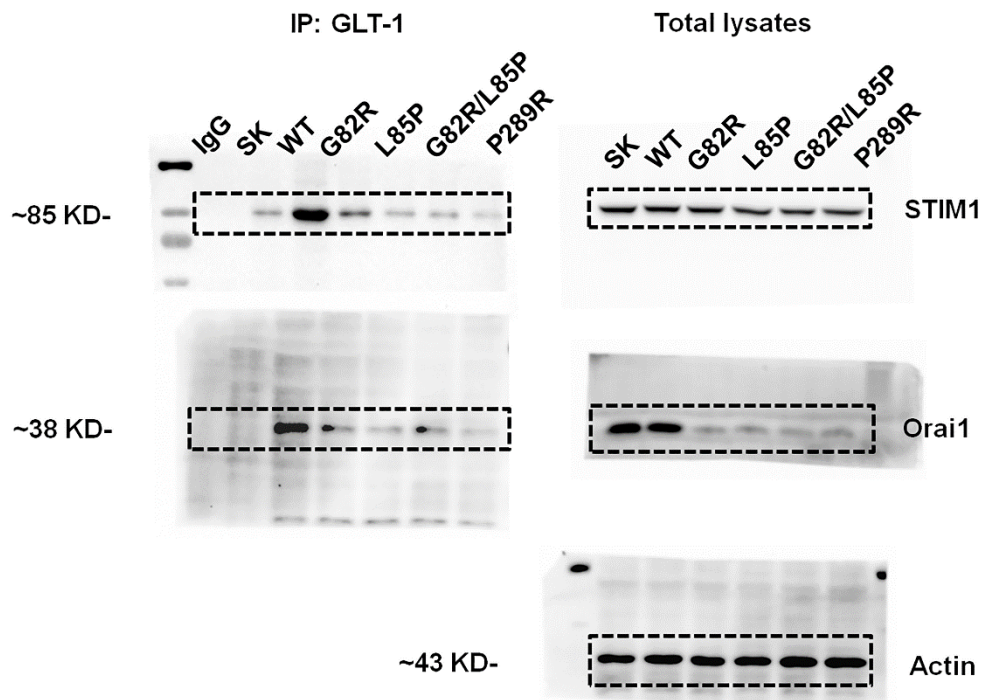

Figure 4G

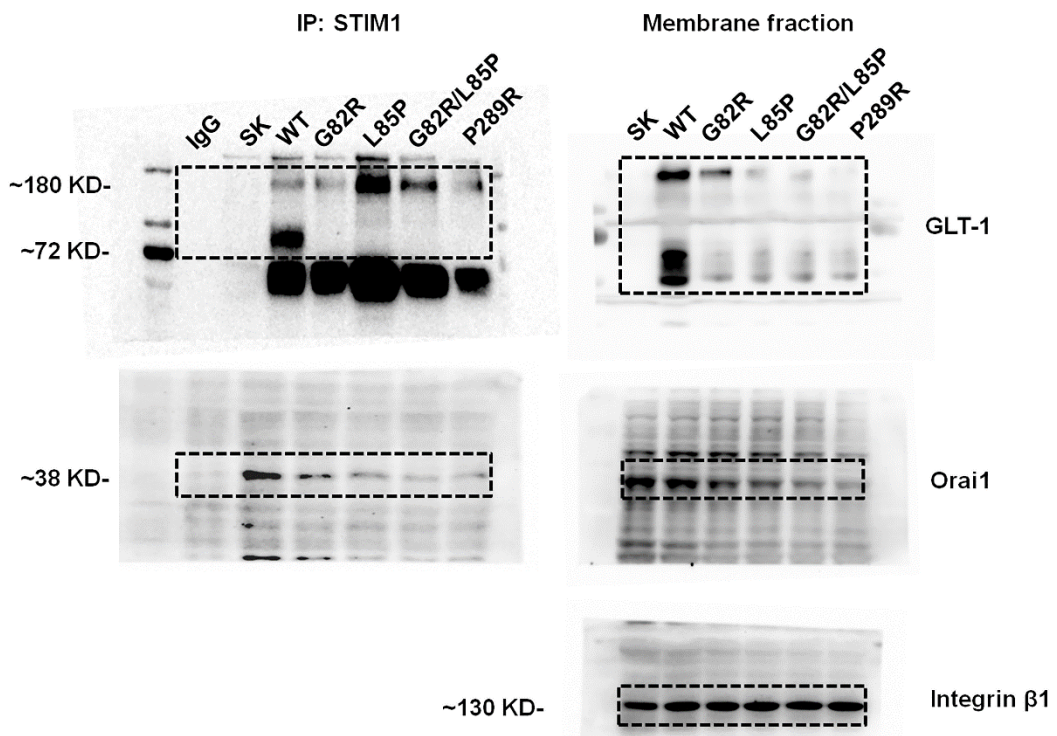

**Figure 6C**

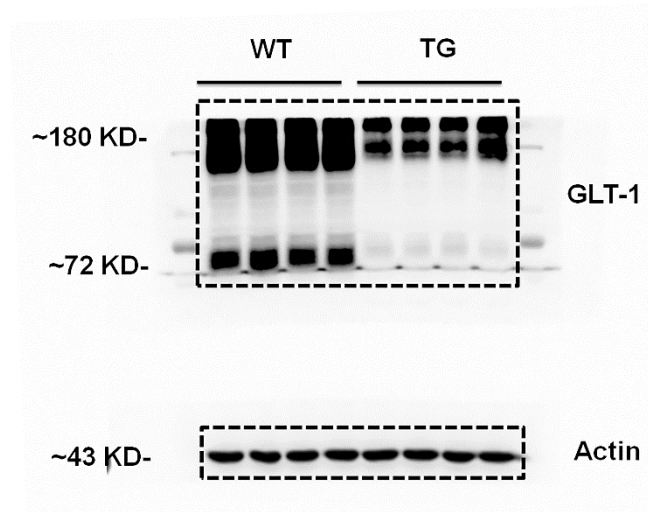

**Figure 6E**

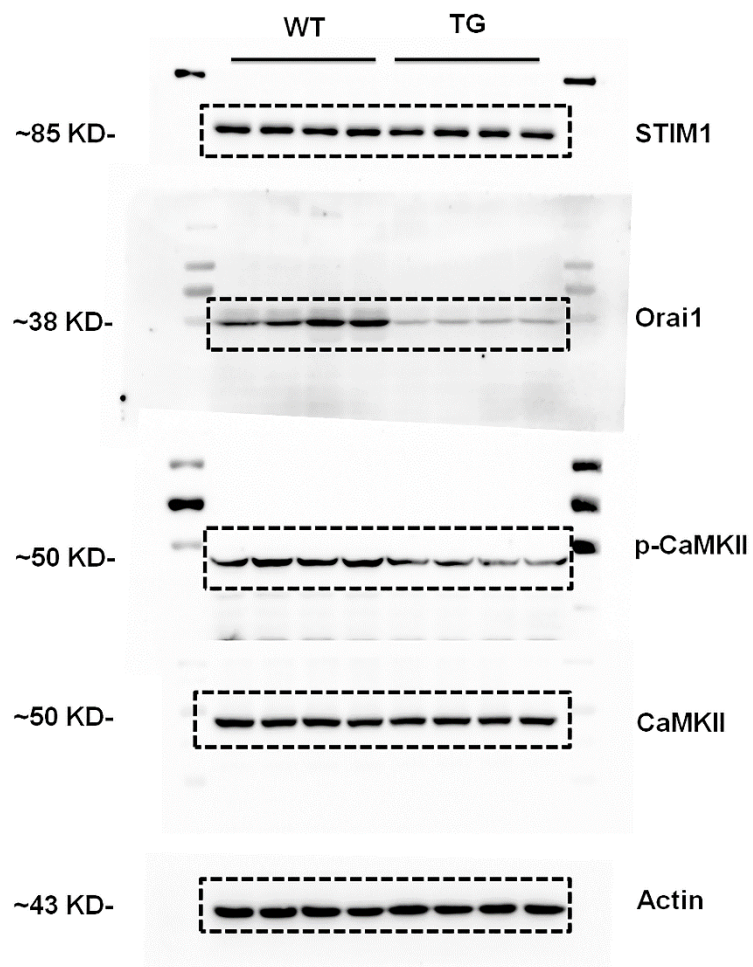

Supplement: 41419_2022_5457_MOESM9_ESM.pdf [file 41419_2022_5457_MOESM9_ESM.pdf]
